# Supplementary material for: NIR-excited upconversion nanoparticles used for targeted inhibition of Aβ42 monomers and disassembly of Aβ42 fibrils
Source: Royal Society of Chemistry journal article supplement (doi:10.1039/d2tb02104h), 2022-12-19
Supplement: d2tb02104h1.pdf [file d2tb02104h1.pdf]

## Supporting Information

### **NIR-excited upconversion nanoparticles used for targeted inhibition of A $\beta$ 42 monomers and disassembly of A $\beta$ 42 fibrils**

Yijia Guan,<sup>a</sup> Weijie Cao,<sup>a</sup> Tao Li,<sup>a,b,\*</sup> Jieyi Qin,<sup>a</sup> Qilong He,<sup>a</sup> Xiaofeng Jia,<sup>a</sup> Yuqing Li,<sup>a</sup>  
Yuhua Zhang,<sup>a</sup> and Jianguo Liao<sup>a,\*</sup>

[a] Dr. Y. Guan, W. Cao, Prof. T. Li, J. Qin, Q. He, X. Jia, Y. Li, Y. Zhang, Prof. J. Liao  
School of Materials Science and Engineering, Henan Polytechnic University, Siji Road 2001,  
Jiaozuo, Henan, China, 454000,

E-mail: taoli17@hpu.edu.cn, liaojianguo10@hpu.edu.cn

[b] Prof. T. Li

SDU NanoSYD, Mads Clausen Institute University of Southern Denmark Sønderborg DK-6400,  
Denmark

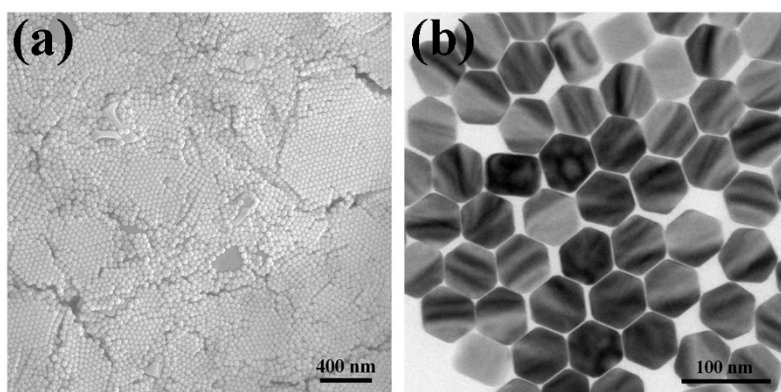

Figure S1 (a) SEM image and (b) TEM image of UCNPs.

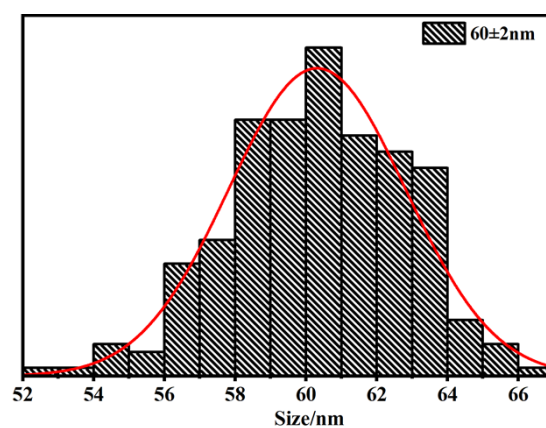

Figure S2 Particle size distribution of UCNPs.

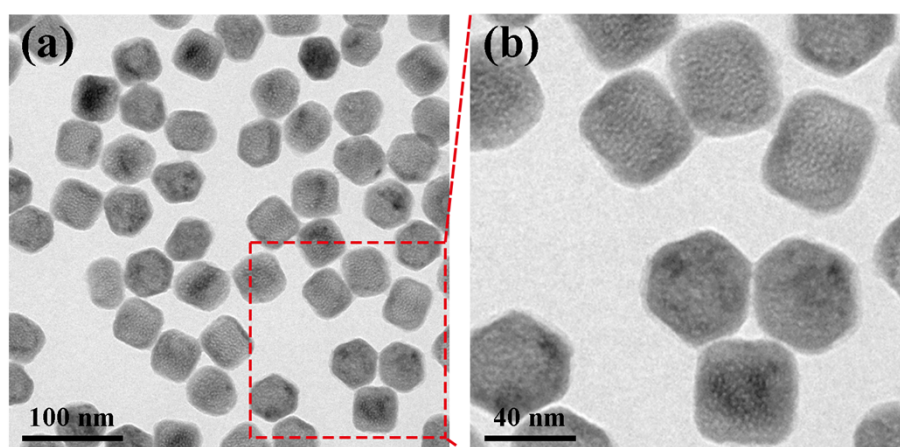

Figure S3 TEM image of UCNPs@SiO<sub>2</sub>.

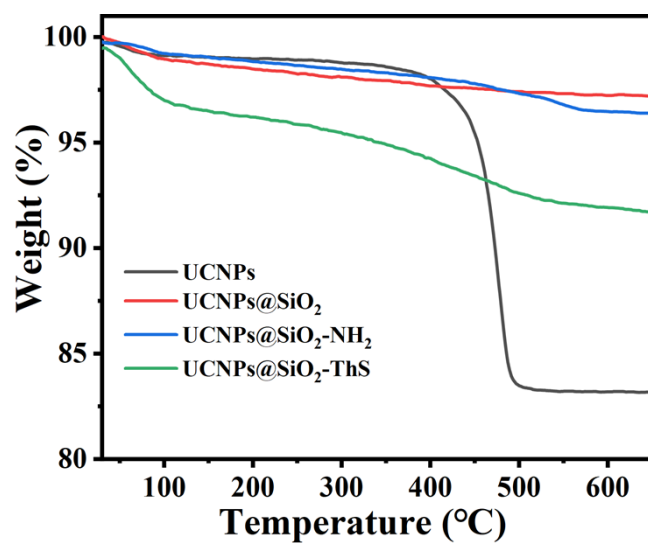

Figure S4 TGA of UCNPs, UCNPs@SiO<sub>2</sub>, UCNPs@SiO<sub>2</sub>-NH<sub>2</sub>, and UCNPs@SiO<sub>2</sub>-ThS.

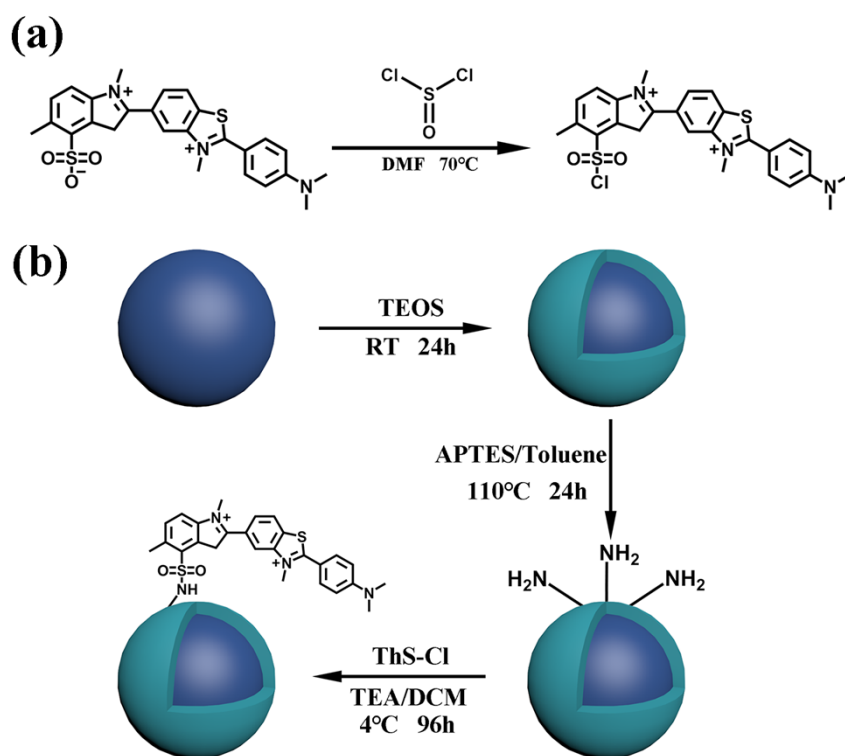

Figure S5 Synthesis of modified ThS (ThS-Cl) and functional UCNPs (UCNPs@SiO<sub>2</sub>-ThS).

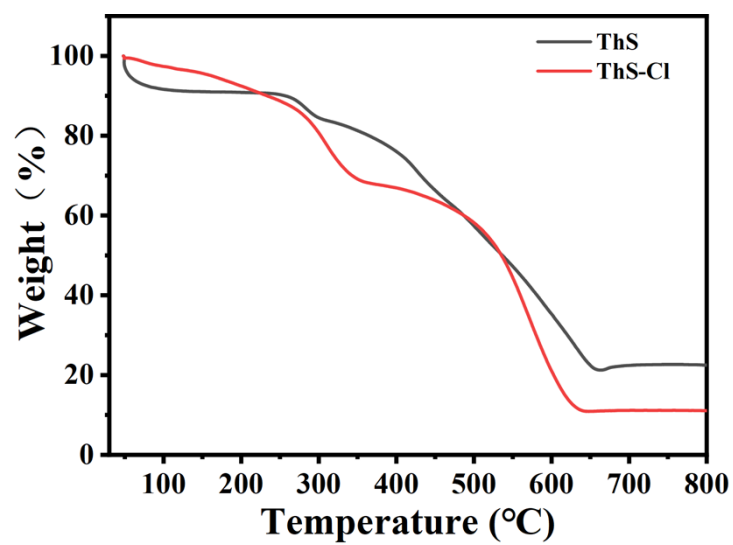

Figure S6 TGA of ThS and ThS-Cl.

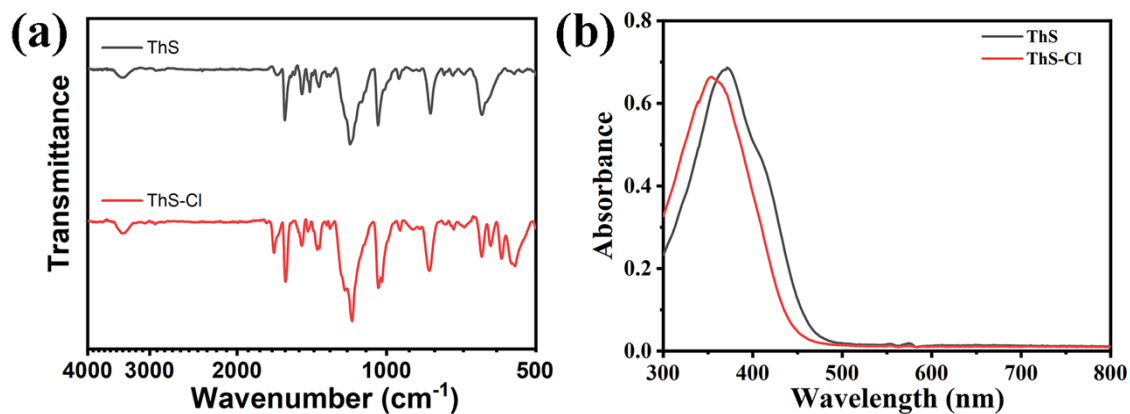

Figure S7 (a) FTIR spectra of ThS and ThS-Cl. (b) UV-vis spectra of ThS and ThS-Cl.

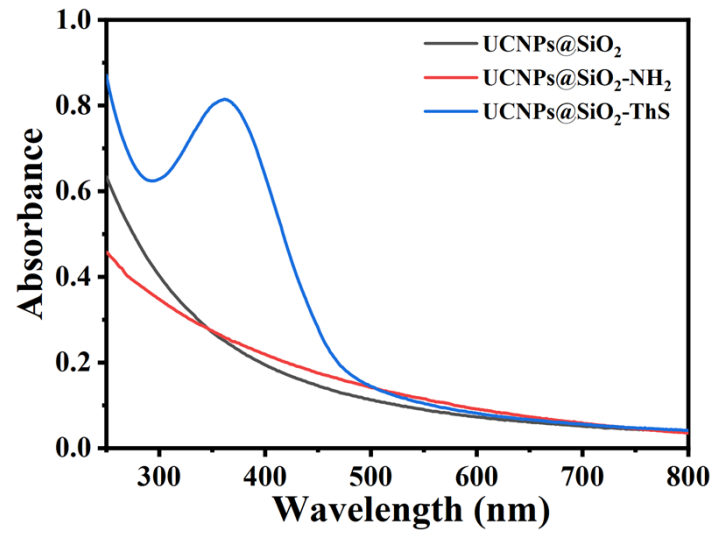

Figure S8 UV-Vis absorption spectra of UCNPs@SiO<sub>2</sub>, UCNPs@SiO<sub>2</sub>-NH<sub>2</sub>, and UCNPs@SiO<sub>2</sub>-ThS.

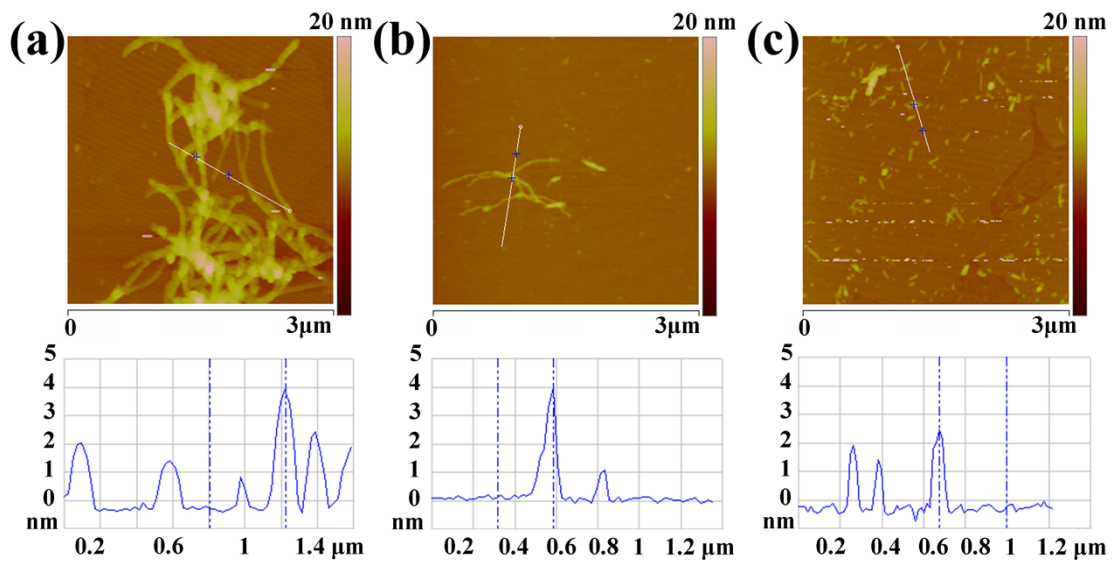

Figure S9 AFM images of (a) A $\beta$ 42 fibrils, (b) A $\beta$ 42 fibrils + UCNPs@SiO<sub>2</sub>-ThS, (c) A $\beta$ 42 fibrils + UCNPs@SiO<sub>2</sub>-ThS + NIR.

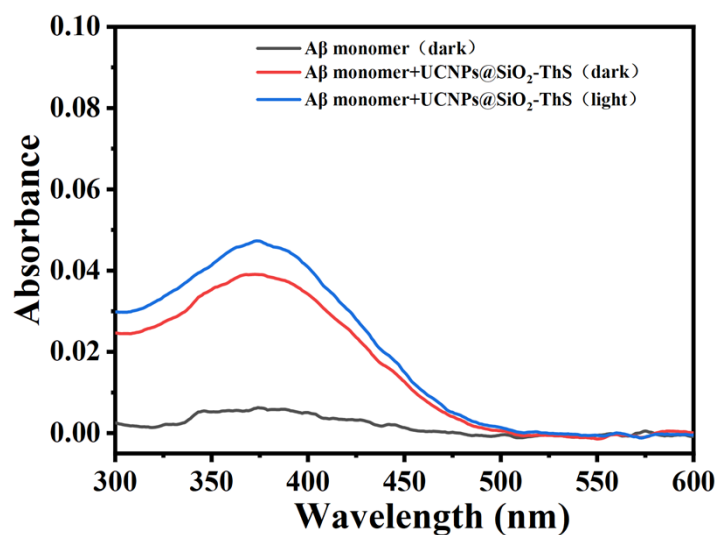

Figure S10 DNP analysis of A $\beta$  monomers under dark condition (black line), A $\beta$  monomers incubated with UCNPs@SiO<sub>2</sub>-ThS under dark condition (red line) and under the irradiation of NIR light (blue line).

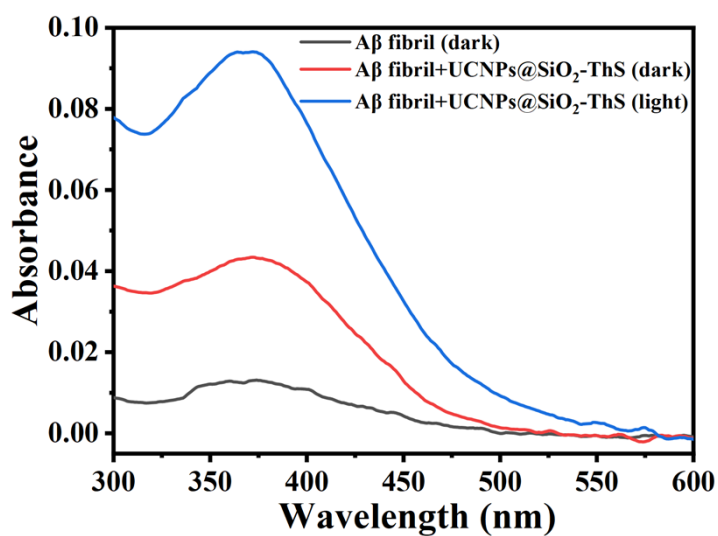

Figure S11 DNP analysis of A $\beta$  fibrils under dark condition (black line), A $\beta$  fibrils incubated with UCNPs@SiO<sub>2</sub>-ThS under dark condition (red line) and under the irradiation of NIR light (blue line).

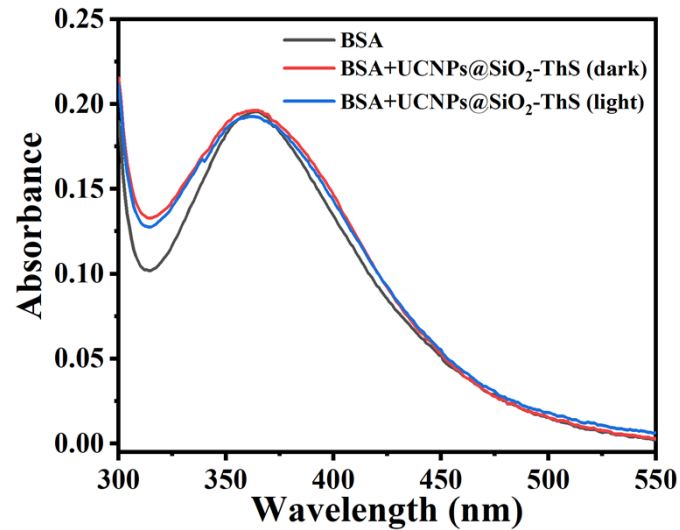

Figure S12 DNP analysis of BSA under dark condition (black line), BSA incubated with UCNPs@SiO<sub>2</sub>-ThS under dark condition (red line) and under the irradiation of NIR light (blue line).

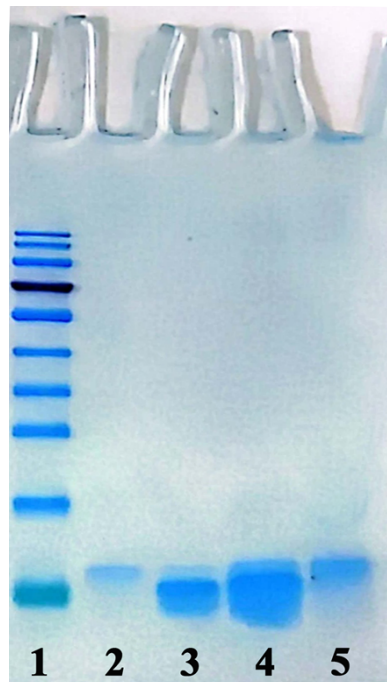

Figure S13 PAGE analysis of the protein absorbed by UCNPs@SiO<sub>2</sub>-ThS/pep from the mixture of A $\beta$ <sub>42</sub> oligomers and insulin. (1) marker; (2) A $\beta$ <sub>42</sub> oligomers, (3) insulin, (4) the mixture of A $\beta$ <sub>42</sub> oligomers and insulin, (5) the protein absorbed by UCNPs@SiO<sub>2</sub>-ThS/pep from the mixture of A $\beta$ <sub>42</sub> oligomers and insulin.

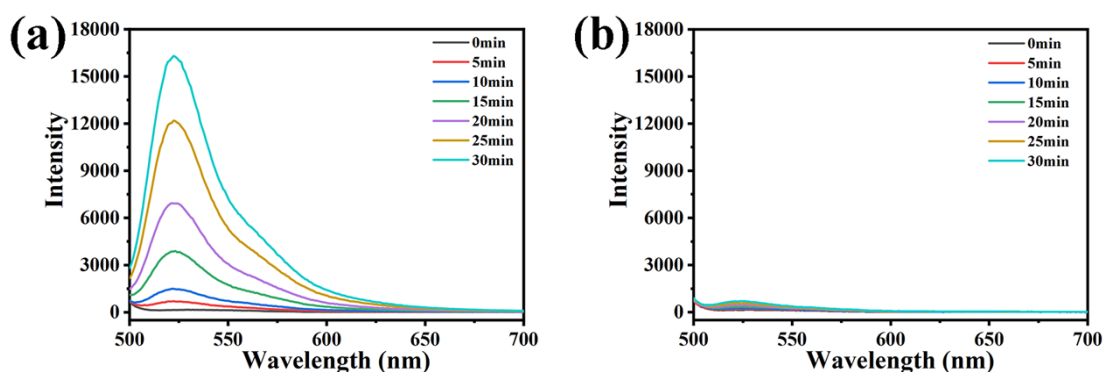

Figure S14 DCFH-DA assay for testing the generation of ROS by the incubation of UCNPs@SiO<sub>2</sub>-ThS (a) with NIR irradiation or (b) without NIR irradiation.

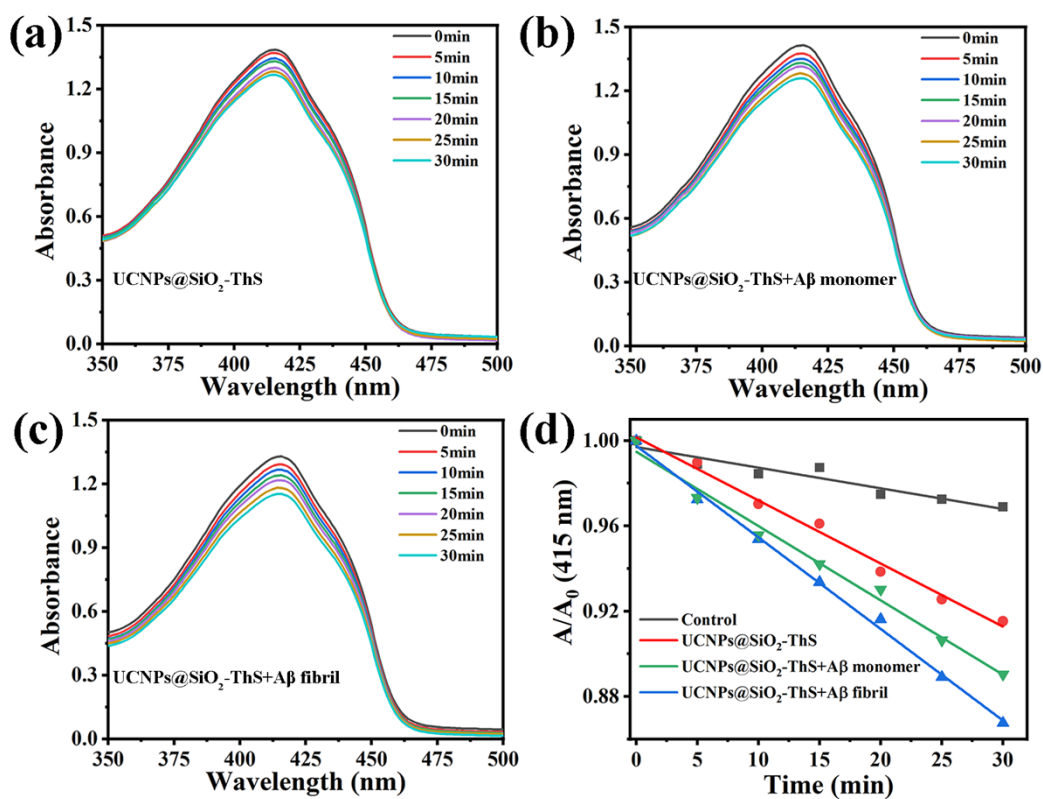

Figure S15 DPBF assay for testing the generation of <sup>1</sup>O<sub>2</sub> by the irradiation of NIR light and incubation of (a) UCNPs@SiO<sub>2</sub>-ThS, (b) UCNPs@SiO<sub>2</sub>-ThS + Aβ monomers, (c) UCNPs@SiO<sub>2</sub>-ThS + Aβ fibrils. (d) The generation of <sup>1</sup>O<sub>2</sub> as a function of time by UCNPs@SiO<sub>2</sub>-ThS with or without the incubation of Aβ<sub>42</sub> monomers or fibrils.



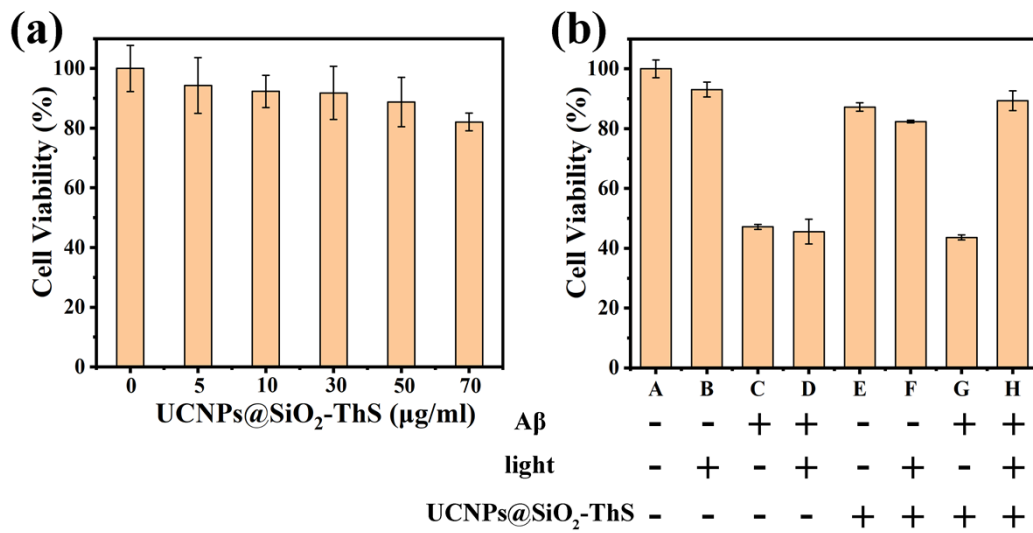

Figure S16 (a) Biocompatibility of UCNPs@SiO<sub>2</sub>-ThS detected by MTT assay. (b) Aβ fibril induced PC12 cell viability in the presence or absence of UCNPs@SiO<sub>2</sub>-ThS.
